# Supplementary material
Source: bioRxiv or medRxiv preprint supplement (https://medrxiv.org/highwire/filestream/85570/field_highwire_adjunct_files/0/2020.06.10.20127720-1.pdf)
Supplement: Supplementary file [file 2020.06.10.20127720-1.pdf]

# Supplemental Appendix

## Table of Contents

|                                                                     |            |
|---------------------------------------------------------------------|------------|
| 1. AMA-1 hemi-nested PCR protocol for amplicon deep-sequencing..... | pages 3, 4 |
| 2. Figure 1: Bioinformatics workflow .....                          | 5          |
| 3. Table 1: Detailed explanation of skip rule criteria.....         | 6          |
| 4. Table 2: Haplotype sequences and frequencies.....                | 7          |

## 1. AMA-1 hemi-nested PCR protocol for amplicon deep-sequencing

| Primer   | Sequence (5'→3')                                            |
|----------|-------------------------------------------------------------|
| Ama1OF   | GCTGAAGTAGCTGGA ACTCAA                                      |
| Ama1F+a* | acactctttcctacacgacgctcttccgatct-<br>CCATCAGGGAAATGTCCAGT   |
| Ama1R+a  | gtgactggagttcagacgtgtgctcttccgatct-<br>TTTCCTGCATGTCTTGAACA |

\*a = adapter

### AMA1 Nested PCR Protocol

25µl Reaction

| Reagent                        | Initial Concentration           | Volume Added (µl) | Final Concentration           |
|--------------------------------|---------------------------------|-------------------|-------------------------------|
| FastStart High Fidelity Buffer | 10X with 18mM MgCl <sub>2</sub> | 2.5               | 1X (1.8mM MgCl <sub>2</sub> ) |
| dNTPs                          | 10mM                            | 0.5               | 200uM each dNTP               |
| Roche High Fidelity Taq        | 5U / µl                         | 0.25              | 2.5 U                         |
| Pf AMA1OF primer               | 10uM                            | 0.5               | 167nM                         |
| Pf AMA1R primer                | 10uM                            | 0.5               | 167nM                         |
| Template DNA                   | -                               | 5                 | -                             |
| Water                          | -                               | 15.75             | -                             |

Use same master mix protocol for Round 1 and Round 2, substituting “AMA1OF Primer” with “AMA1F-a”, “AMA1R primer” with “AMA1R-a primer” and “Template DNA” with “Round 1 PCR Product” in Round 2.

### Cycling Conditions

1<sup>st</sup> round PCR

| Cycling Conditions R1 | Temperature               | Time    |
|-----------------------|---------------------------|---------|
| Step 1                | 95 C                      | 2 min   |
| Step 2                | 95 C                      | 30 sec  |
| Step 3                | 55 C                      | 30 sec  |
| Step 4                | 72 C                      | 1 min   |
| Step 5                | Repeat step 2-4 total 20X |         |
| Step 6                | 72 C                      | 10 min  |
| Step 7                | 4 C or 12 C               | forever |

2<sup>nd</sup> round PCR

| <b>Cycling Conditions R2</b> | <b>Temperature</b>                      | <b>Time</b> |
|------------------------------|-----------------------------------------|-------------|
| Step 1                       | 95 C                                    | 2 min       |
| Step 2                       | 95 C                                    | 30 sec      |
| Step 3                       | 55 C                                    | 30 sec      |
| Step 4                       | 72 C                                    | 1 min       |
| Step 5                       | Repeat step 2-4 total 10X, 20X, or 25X* |             |
| Step 6                       | 72 C                                    | 10 min      |
| Step 7                       | 4 C or 12 C                             | forever     |

\*10X for samples with parasite density between 10,000 and 1,000 parasites/ $\mu$ L

20X for samples with parasite density between 1,000 and 10 parasites/ $\mu$ L

25X for samples with parasite density between 10 and 0.1 parasites/ $\mu$ L

**INDEXING PCR**

50 $\mu$ L reaction

| <b>Reagent</b>                             | <b>Volume Added (ul)</b> |
|--------------------------------------------|--------------------------|
| NEBNext MasterMix                          | 25 $\mu$ L               |
| Sample (2 <sup>nd</sup> round PCR product) | 15 $\mu$ L               |
| Barcode                                    | 10 $\mu$ L               |

| <b>Temperature</b> | <b>Time</b> | <b>Cycles</b> |
|--------------------|-------------|---------------|
| 98 C               | 30 sec      |               |
| 98 C               | 10 sec      | 8-22 cycles   |
| 65 C               | 75 sec      |               |
| 65 C               | 5 min       |               |
| 10 C               | forever     |               |

## 2. Figure 1: Bioinformatics workflow

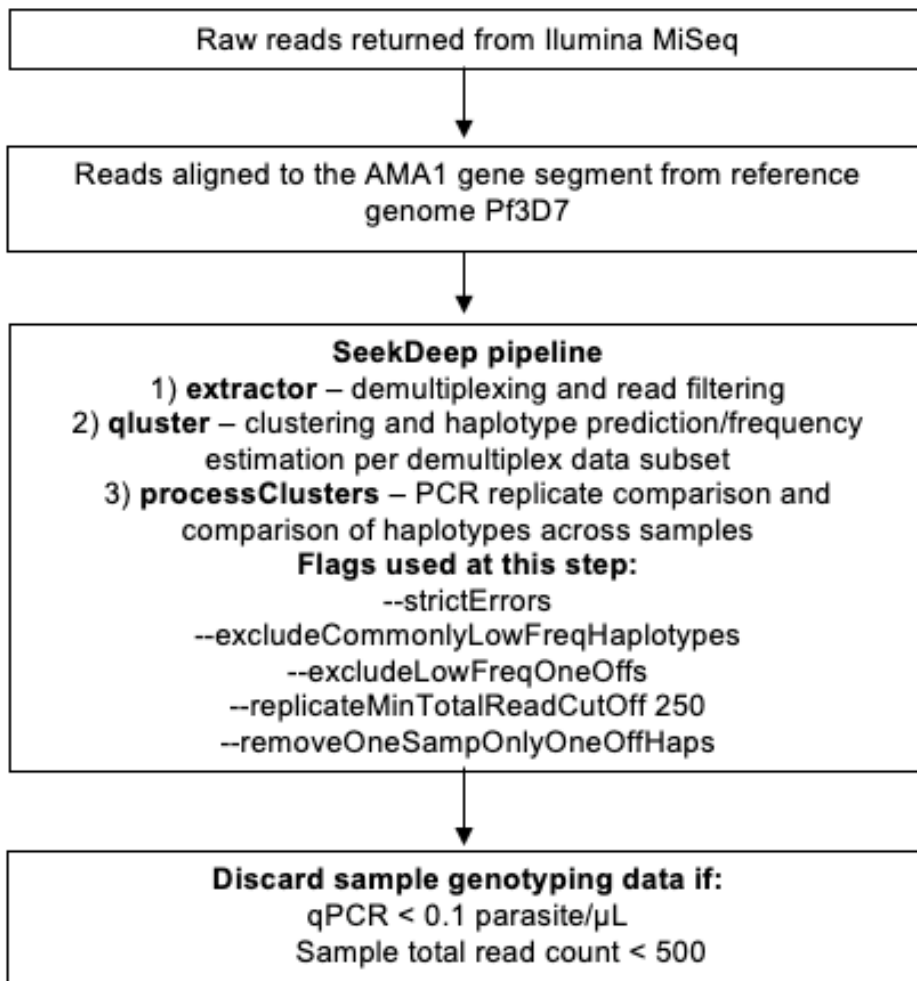

### 3. Table 1. Detailed explanation of skip rule criteria

**By clone:**

- 1) "Skips" = dates on which haplotypes recovered from a genotyped sample did not include a clone seen previously in that individual, or where qPCR was negative
- 2) 4 skips in a row were required to call the infection with that clone cleared
- 3) If there were  $\leq 3$  skips and the same haplotype is detected again, infection with that clone is presumed to have continued throughout the dates of the skips
- 4) If there were 4 skips and the same haplotype was detected again, it was considered a new infection with that clone

**By infection event:**

- 1) "Skips" = dates on which haplotypes recovered from a genotyped sample did not include any of the haplotypes included in an infection event, or where qPCR was negative
- 2) 4 skips in a row were required to call the infection event cleared
- 3) If there were  $\leq 3$  skips and any haplotype from the same infection event was detected again, that infection event is presumed to have continued throughout the dates of the skips
- 4) If there were 4 skips and haplotypes from a previous infection event were detected again, it was considered a new infection event
